# Supplementary material for: Graphdiyne oxide nanosheets display selective anti-leukemia efficacy against DNMT3A-mutant AML cells
Source: PubMed Central journal article supplement (PMC9512932; doi:10.1038/s41467-022-33410-w), 2022-09-26
Supplement: 41467_2022_33410_MOESM1_ESM.pdf [file 41467_2022_33410_MOESM1_ESM.pdf]

## Supplementary Information

Graphdiyne oxide nanosheets display selective anti-leukemia  
efficacy against DNMT3A-mutant AML cells

Qiwei Wang. *et al*

---

**Corresponding authors:**

\*Pengxu Qian

Investigator

School of Medicine, Zhejiang University

Email: [axu@zju.edu.cn](mailto:axu@zju.edu.cn)

\* Chunying Chen

Investigator

National Center for Nanoscience and Technology of China

Email: [chenchy@nanoctr.cn](mailto:chenchy@nanoctr.cn)

**The PDF file includes:**

Supplementary Figure 1 to 40

**Other Supplementary Material for this manuscript includes the following:**

Supplementary Movies 1 to 6

Supplementary Data 1 to 4

## Supplementary Figures

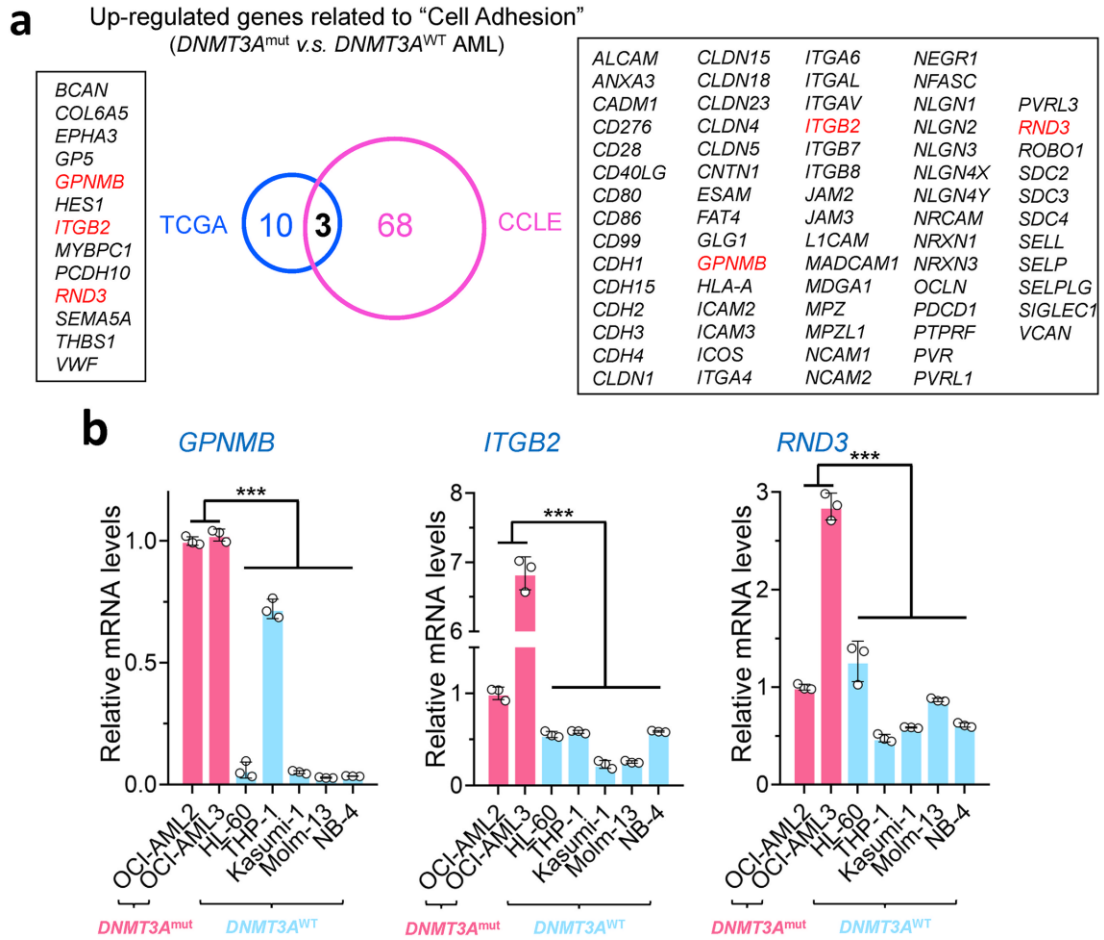

**Supplementary Figure 1. Up-regulated genes related to “Cell Adhesion” in *DNMT3A*-mutant AML.** **a**, Venn diagram of up-regulated genes in *DNMT3A*-mutant AML cells isolated from both AML patients (TCGA: *DNMT3A*<sup>mut</sup>, *n* = 36; *DNMT3A*<sup>WT</sup>, *n* = 115) and AML cell lines (CCLE: *DNMT3A*<sup>mut</sup>, *n* = 4; *DNMT3A*<sup>WT</sup>, *n* = 30). **b**, Q-PCR verifications of three overlapped genes of TCGA and CCLE databases in human AML cell lines. *n* = 3 biologically independent experiments. The data were shown as the mean ± SD. Statistical significance was tested with One-way ANOVA test. \*\*\**P* < 0.001.

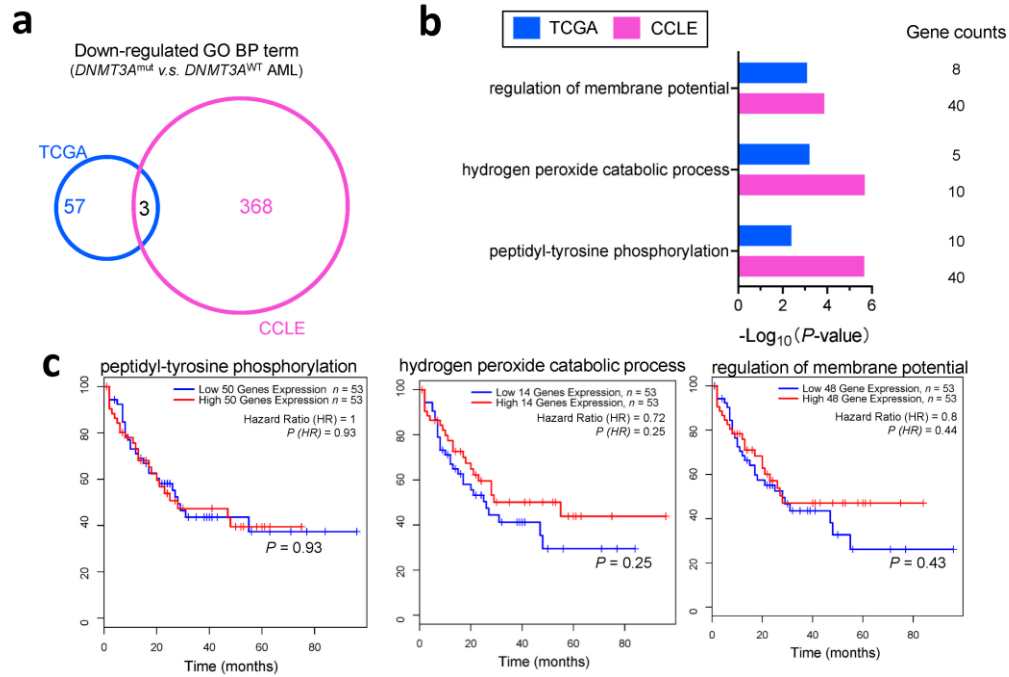

**Supplementary Figure 2. Down-regulated biological process (BP) terms in *DNMT3A*-mutant AML.** **a**, Venn diagram of down-regulated BP terms in *DNMT3A*-mutant AML cells isolated from both AML patients (TCGA: *DNMT3A*<sup>mut</sup>,  $n = 36$ ; *DNMT3A*<sup>WT</sup>,  $n = 115$ ) and AML cell lines (CCLE: *DNMT3A*<sup>mut</sup>,  $n = 4$ ; *DNMT3A*<sup>WT</sup>,  $n = 30$ ). **b**, Three down-regulated BP terms in the intersection and corresponding gene counts. The statistical tests were one-sided and adjustments were made for multiple comparisons. **c**, Survival curves of AML patients with high and low expression designated gene sets, and  $n$  is the number of biologically independent samples. The survival analyses were performed by the log-rank (Mantel–Cox) test.

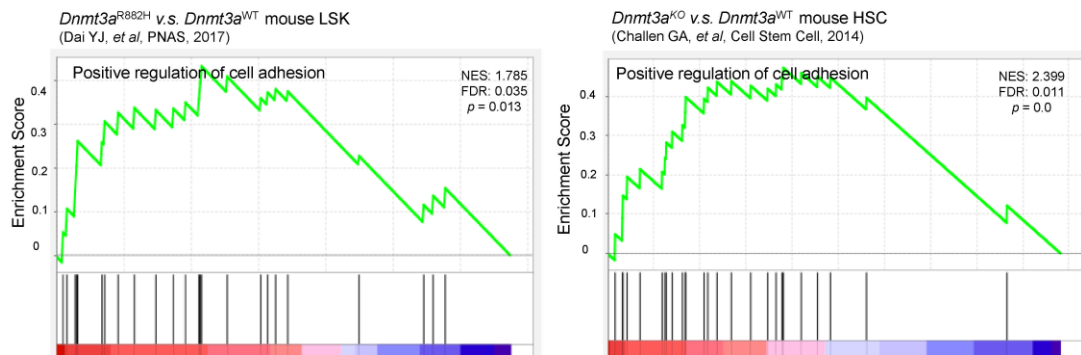

**Supplementary Figure 3. Gene set enrichment analysis (GSEA) of “Positive regulation of cell adhesion” in *Dnmt3a*<sup>R882H</sup> mouse LSK cells and *Dnmt3a*<sup>-/-</sup> mouse HSCs.** The statistical tests were one-sided and adjustments were made for multiple comparisons.

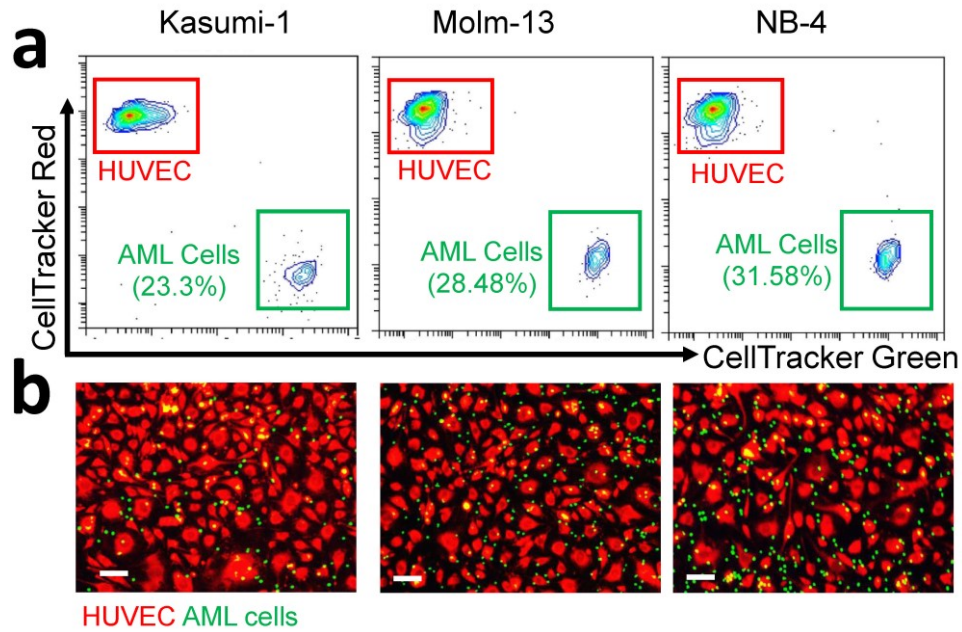

**Supplementary Figure 4. Cell-cell adhesion between AML cells and HUVECs.** Flow cytometry data (a) and fluorescent images (b), Scale bar, 50  $\mu\text{m}$ .

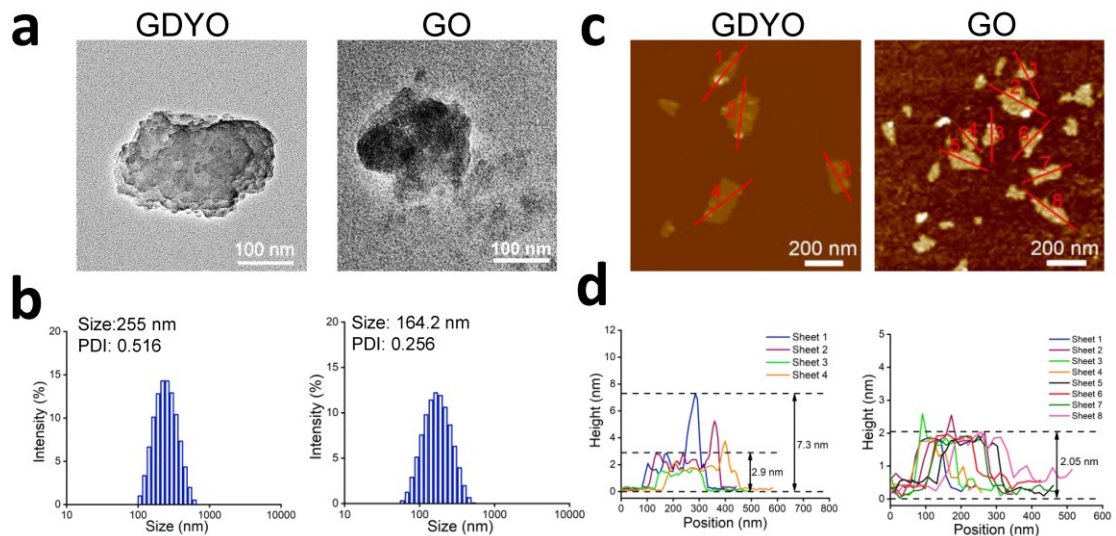

**Supplementary Figure 5. Characterization of GO and GDYO nanosheets.** a-b, TEM and DLS (Dynamic light scattering) characterization for GDYO and GO. Scale bar, 100 nm. c-d, AFM (Atom force microscope) imaging (c) and (d) height characterization for GDYO and GO. Scale bar, 200 nm. a and c, at least 20 images for each sample were taken.

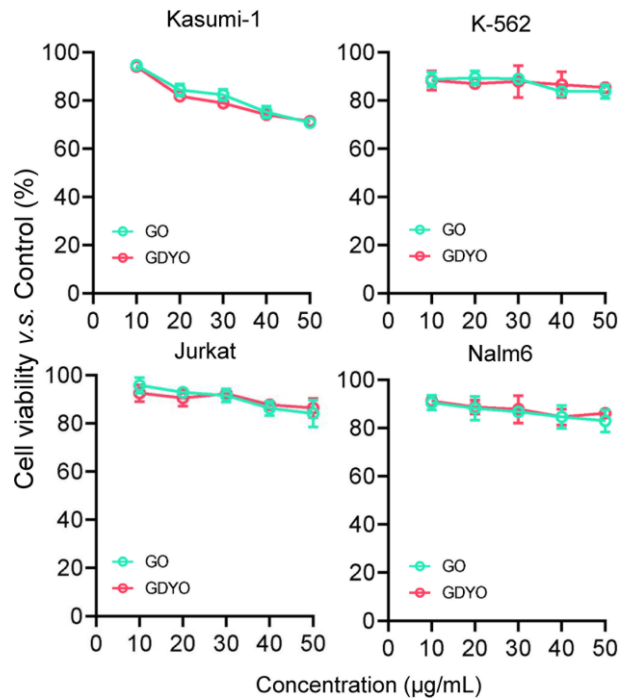

**Supplementary Figure 6. Cell viability assay of DNMT3A wildtype leukemia cell lines (Kasumi-1, K-562, Jurkat and Nalm6) treated with GO or GDYO at different concentrations for 24 h.**  $n = 3$  biologically independent experiments. The data were shown as the mean  $\pm$  SD. Statistical significance was tested with a two-tailed, unpaired Student's  $t$  test.

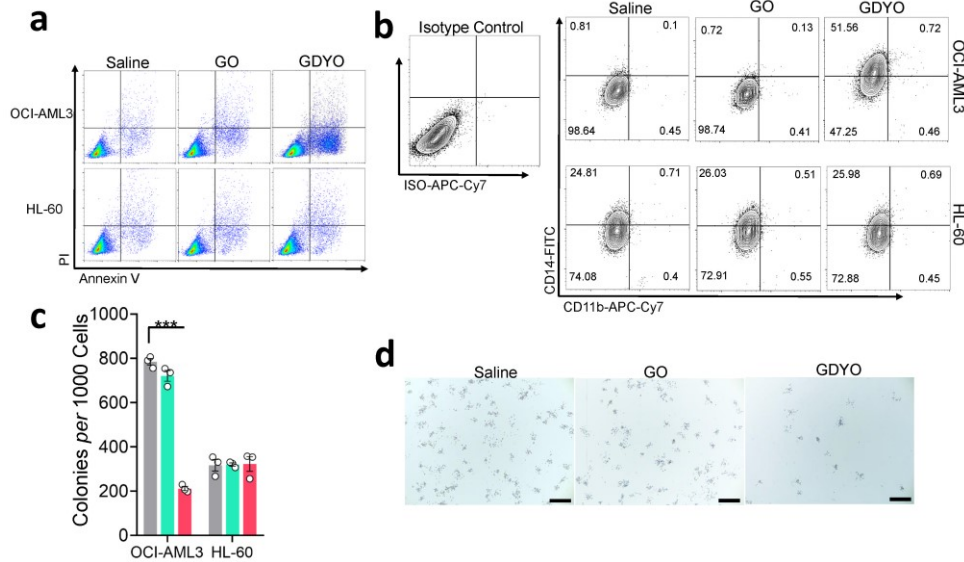

**Supplementary Figure 7. Representative images for apoptosis, myeloid differentiation and CFU in cells treated with GO or GDYO.** **a-b,** Representative flow cytometry images for cell apoptosis (**a**) and myeloid differentiation (**b**). **c,** CFU colonies formation of 1000 cells after 10 d culture in methylcellulose medium.  $n = 3$  biologically independent experiments. The data were shown as the mean  $\pm$  SD. Statistical significance was tested with a two-tailed, unpaired Student's  $t$  test.  $***P < 0.001$ . **d,** CFU colonies images after 10 d culture in methylcellulose medium for OCI-AML3. At least 10 images for each sample were taken. Scale bar, 200 µm.

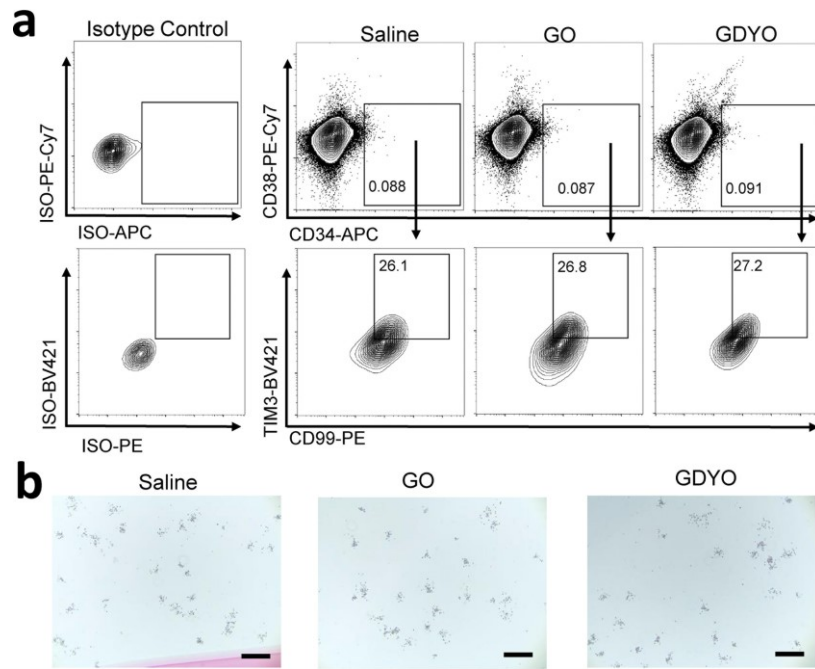

**Supplementary Figure 8. Representative flow cytometry images for leukemia stem cells (a) and microscopy images of CFU (b) in HL-60 treated with GO or GDYO. b, At least 10 images for each sample were taken. Scale bar, 200  $\mu\text{m}$ .**

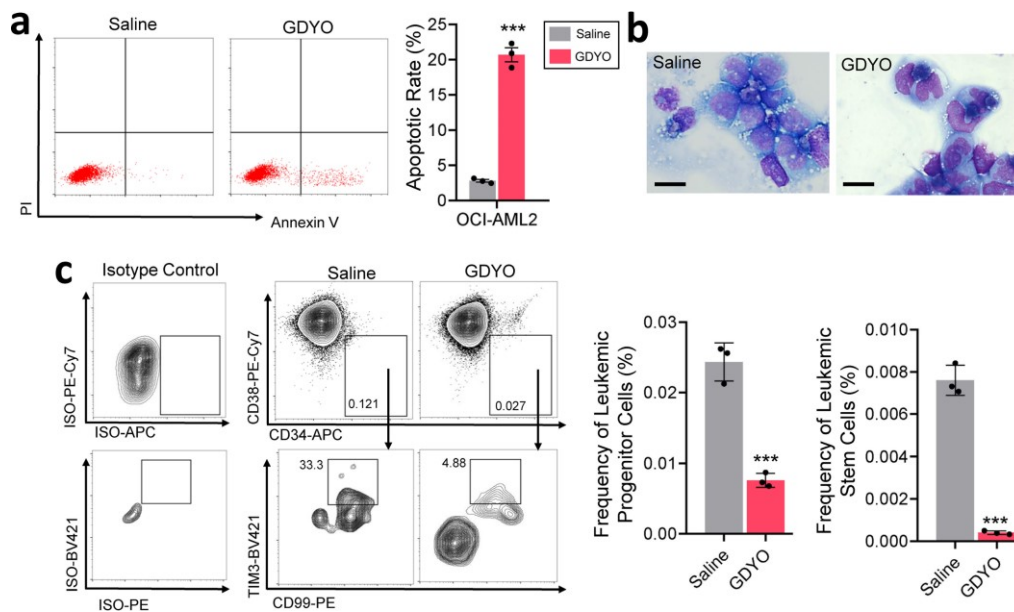

**Supplementary Figure 9. *In vitro* treatment of GDYO displayed anti-leukemia effect against *DNMT3A* mutant AML cells (OCI-AML2). a, Apoptosis analysis in OCI-AML2 treated with 20  $\mu\text{g/mL}$  GO/GDYO for 48 h.  $n = 3$  biologically independent experiments. b, Wright-Giemsa staining showing signs of maturation in GDYO-treated OCI-AML2. Scale bar, 10  $\mu\text{m}$ . c, Analysis of leukemic progenitor cells and leukemic stem cells in OCI-AML2 treated with 20  $\mu\text{g/mL}$  GO/GDYO for 72 h.  $n = 3$  biologically independent experiments. The data were shown as the mean  $\pm$  SD. Statistical significance was tested with a two-tailed, unpaired Student's  $t$  test. \*\*\* $P < 0.001$ .**

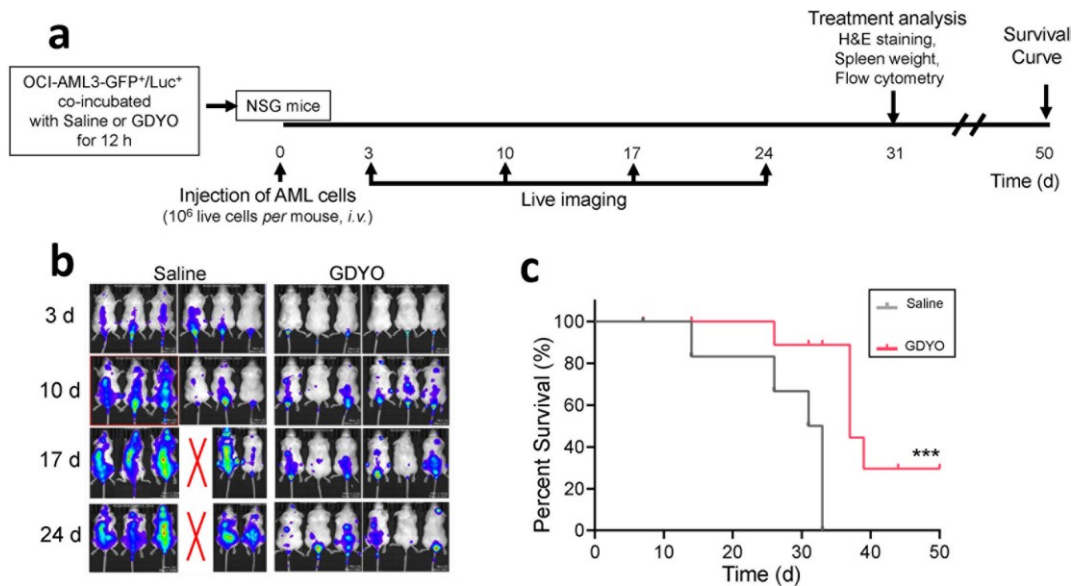

**Supplementary Figure 10. *In vitro* GDYO treatment inhibited *in vivo* leukemogenesis of *DNMT3A*-mutant AML cells.** **a.** Schematic illustration of the experimental design. **b.** Representative IVIS spectrum images of AML NSG mice,  $n = 6$  biologically independent mice. **c.** Kaplan-Meier survival curves of AML mice injected with saline or GDYO. The survival analysis was performed by the log-rank (Mantel-Cox) test. \*\*\* $P < 0.001$ .

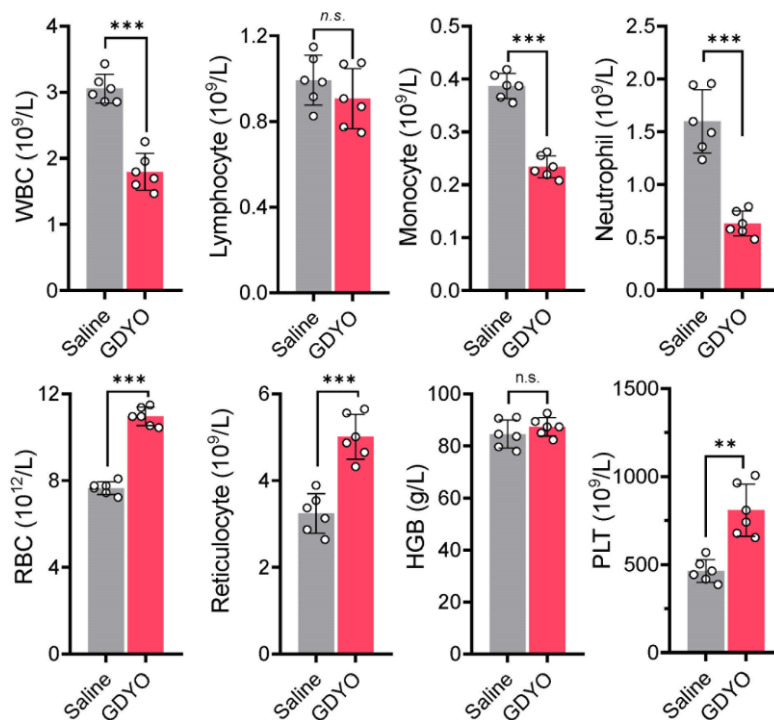

**Supplementary Figure 11. Hematological data of AML mice.** The AML cells were pre-treated with saline or GDYO. WBC, white blood cell, RBC, red blood cell, HGB, hemoglobin, PLT, platelets.  $n = 6$  biologically independent animals. The data are shown as the mean  $\pm$  SD. Statistical significance was tested with a two-tailed, unpaired Student's  $t$  test. *n.s.* no significant, \*\* $P < 0.01$ , \*\*\* $P < 0.001$ .

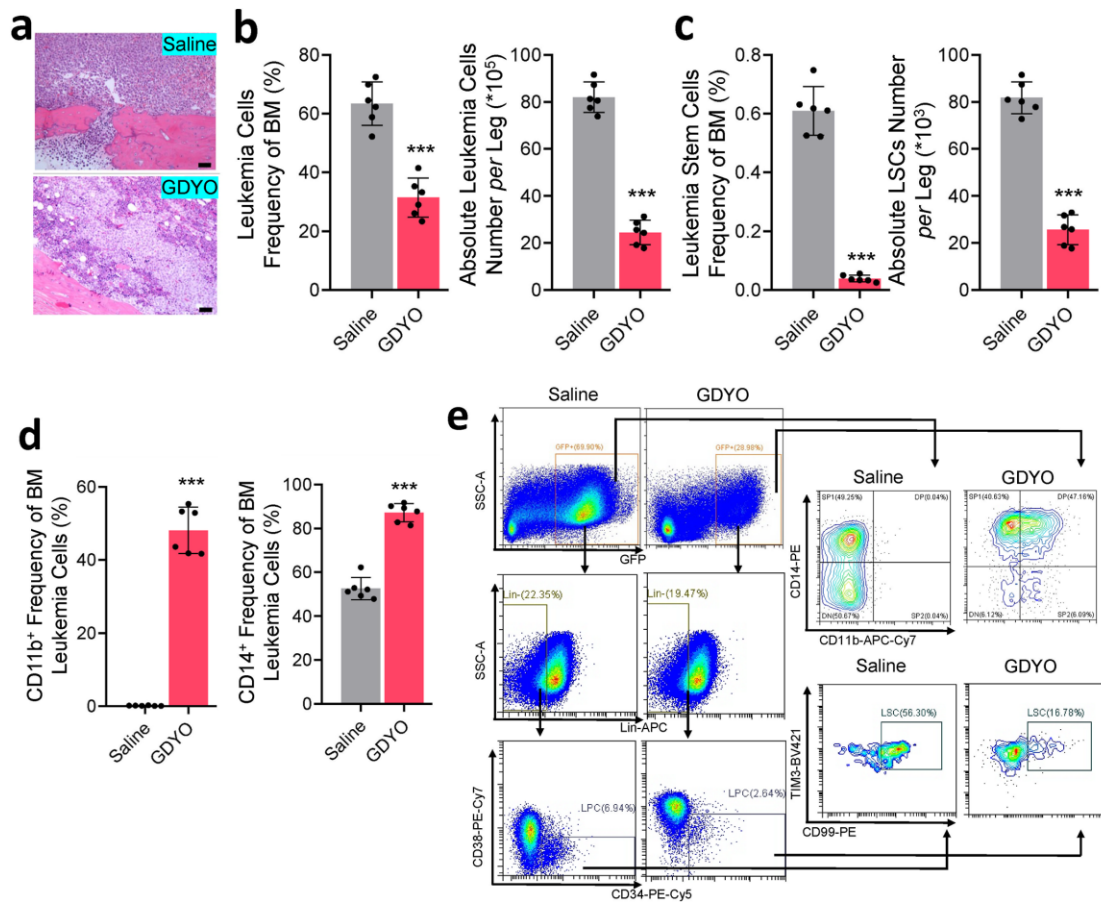

**Supplementary Figure 12. Bone marrow (BM) analysis of AML mice.** The AML cells were pre-treated with saline or GDYO. **a**, H&E staining on bone marrow sections of AML mice injected with saline or GDYO. Scale bar, 10  $\mu$ m. **b-d**, Quantification of leukemia cells (**b**), leukemic stem cells (**c**) and myeloid differentiation (**d**) in bone marrow. **e**, Representative flow cytometry analysis of bone marrow total mononuclear cells.  $n = 6$  biologically independent animals. The data were shown as the mean  $\pm$  SD. Statistical significance was tested with a two-tailed, unpaired Student's  $t$  test. \*\*\* $P < 0.001$ .



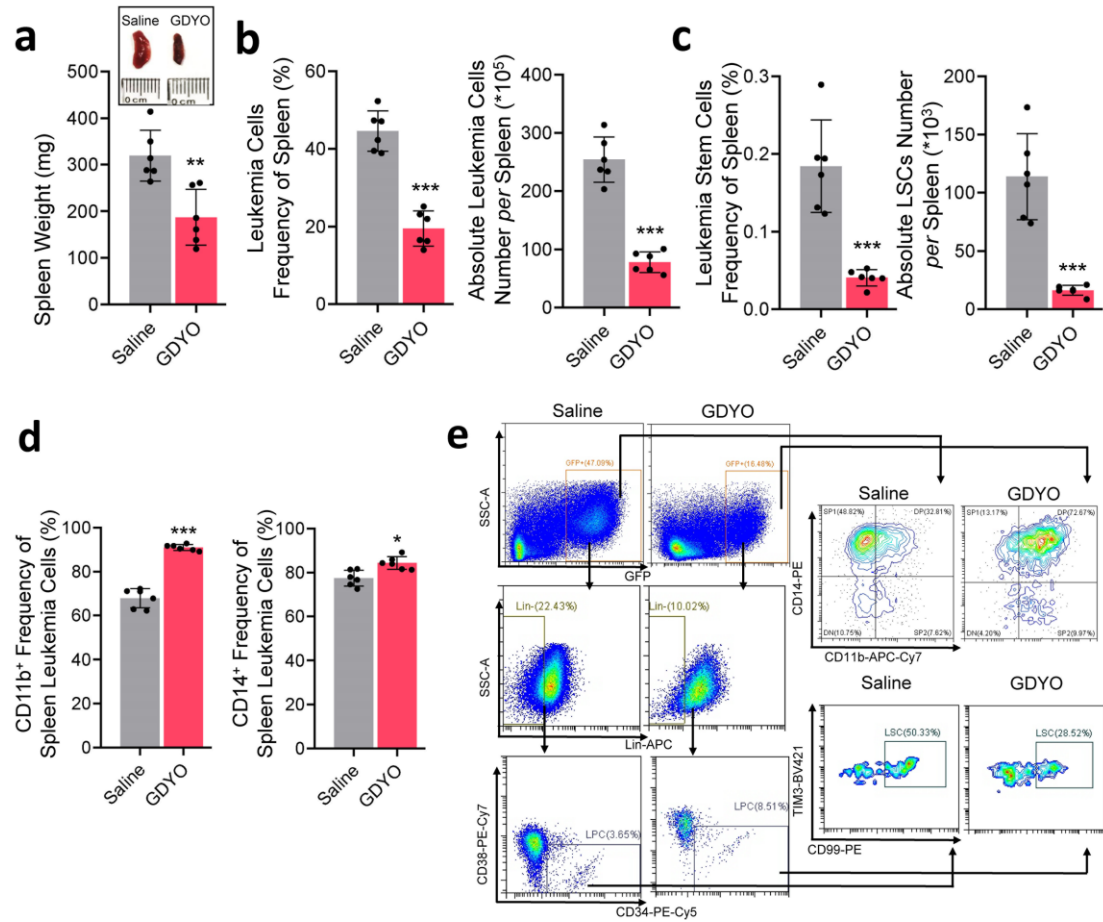

**Supplementary Figure 13. Spleen analysis of AML mice.** The AML cells were pre-treated with saline or GDYO. **a**, Spleen weights of AML mice injected with saline or GDYO at sacrifice. Scale bar, 10  $\mu$ m. **b-d**, Quantification of spleen leukemia cells (**b**), leukemic stem cells (**c**) and myeloid differentiation (**d**). **e**, Representative flow cytometry analysis of spleen total mononuclear cells.  $n=6$  biologically independent animals. The data were shown as the mean  $\pm$  SD. Statistical significance was tested with a two-tailed, unpaired Student's  $t$  test. \* $P < 0.05$ , \*\* $P < 0.01$ , \*\*\* $P < 0.001$ .

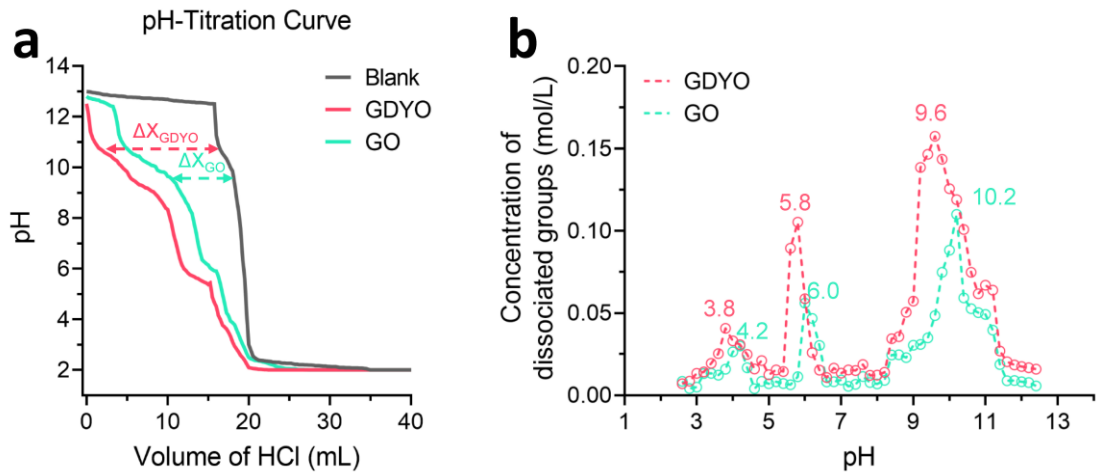

**Supplementary Figure 14. pH titration and acid dissociation curves of GDYO and GO.** (a) The pH titration curves of GDYO and GO.  $\Delta$  indicated the different volume of HCl added in the two titrations at the same value of pH, given the concentrations of the ionized groups *per g* of GDYO or GO at that pH. (b) The experimental (circle) and simulated (dotted line) acid dissociation curves of GDYO and GO dispersions.

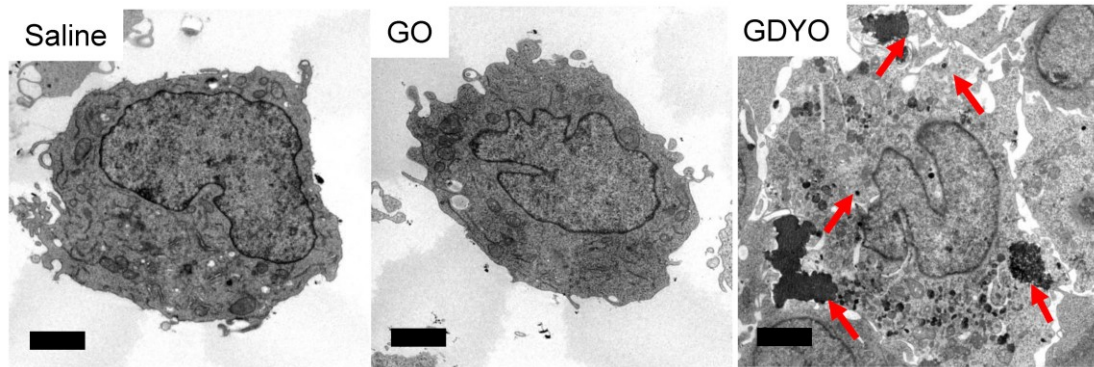

**Supplementary Figure 15. Representative TEM images for OCI-AML3 treated with Saline/GO/GDYO for 48 h.** At least 15 images for each sample were taken. Scale bar, 2  $\mu$ m.

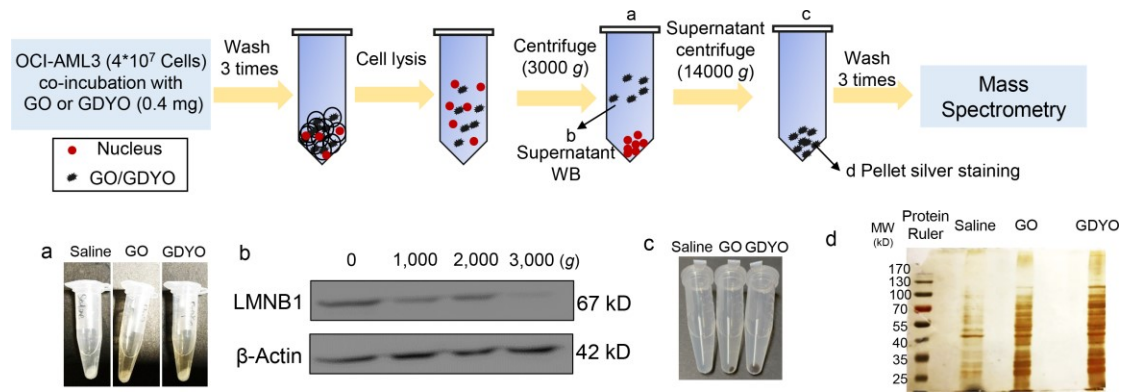

**Supplementary Figure 16. Sample preparation diagram of pull-down protocol to analyze GDYO-interacted proteins.** **a, c,** Photos of the corresponding steps. **b,** 3,000 g maximizes nuclear removal while reducing GDYO loss. **d,** Silver staining of each samples for LS-MS.  $n = 2$  biologically independent experiments.

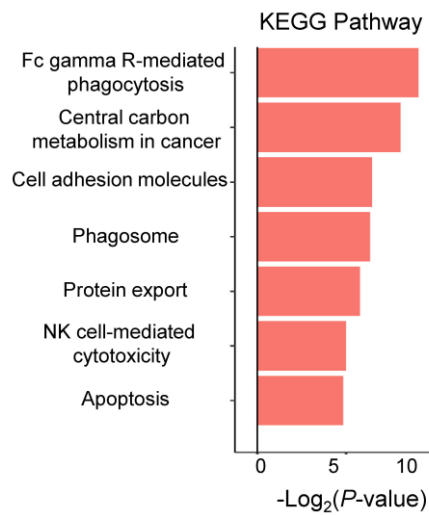

**Supplementary Figure 17. KEGG pathway of GDYO-interacted proteins.** The statistical tests were one-sided and adjustments were made for multiple comparisons.

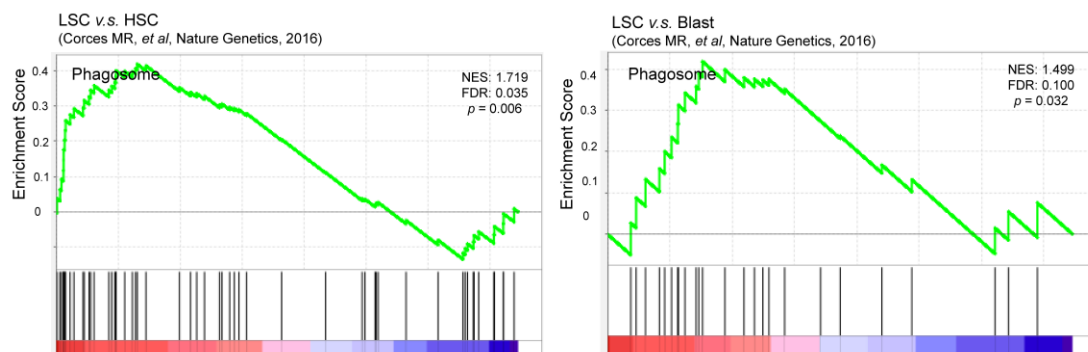

**Supplementary Figure 18. Gene set enrichment analysis (GSEA) in LSC v.s. HSC and LSC v.s. Blast cells for “phagosome”.** The statistical tests were one-sided and adjustments were made for multiple comparisons.

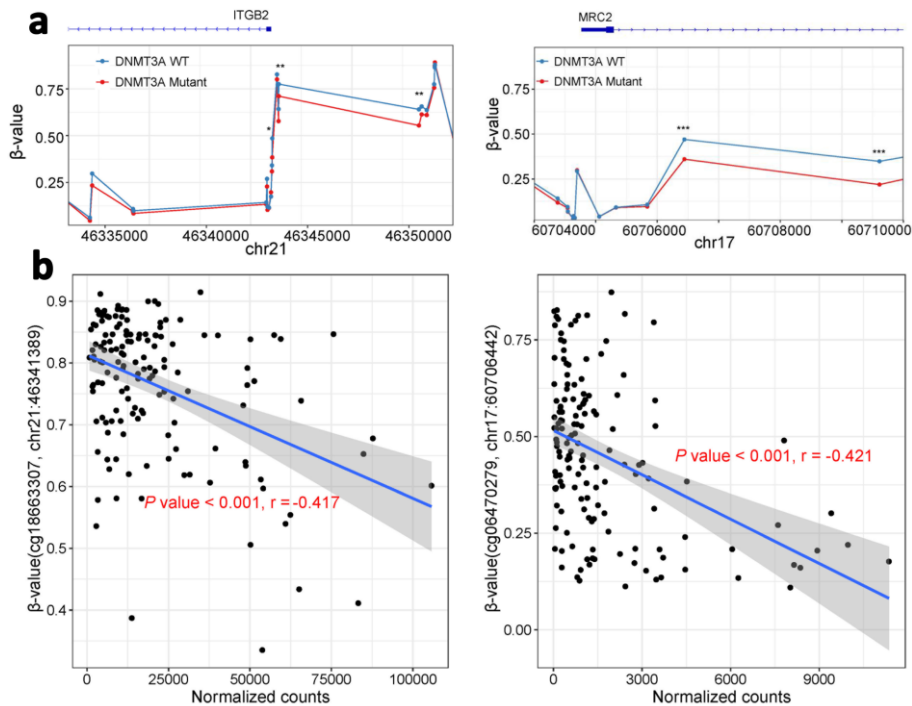

**Supplementary Figure 19. Methylation analysis of ITGB2 and MRC2 in *DNMT3A*-mutated AML.** **a**, Differentially methylated regions (DMRs) for ITGB2 and MRC2 in *DNMT3A* mutant and *DNMT3A* wildtype AML isolated from TCGA. *DNMT3A*-mutant,  $n = 49$ ; *DNMT3A*-wt,  $n = 145$ . The statistical tests were one-sided and adjustments were made for multiple comparisons.  $*p < 0.05$ ,  $**p < 0.01$ ,  $***p < 0.001$ . **b**, Correlation analysis between DMRs and gene expression for ITGB2 and MRC2 in *DNMT3A* mutant and *DNMT3A* wildtype AML isolated from TCGA. *DNMT3A*-mutant,  $n = 49$ ; *DNMT3A*-wt,  $n = 145$ . The statistical tests were one-sided and adjustments were made for multiple comparisons. The blue lines represented the fitted curve and the shaded area as 95% confidence interval.

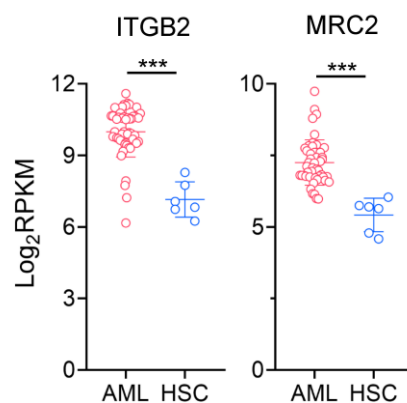

AML: Unsorted BM (GSE13159)  
HSC: Lin-CD34<sup>+</sup>CD38<sup>-</sup>CD90<sup>+</sup>CD45RA<sup>-</sup> (GSE42519)

**Supplementary Figure 20. Expression of ITGB2 and MRC2 in human AML cells and HSCs.** AML,  $n = 48$ ; HSC,  $n = 6$ . The data were shown as the mean  $\pm$  SD. Statistical significance was tested with a two-tailed, unpaired Student's  $t$  test.  $***p < 0.001$ .

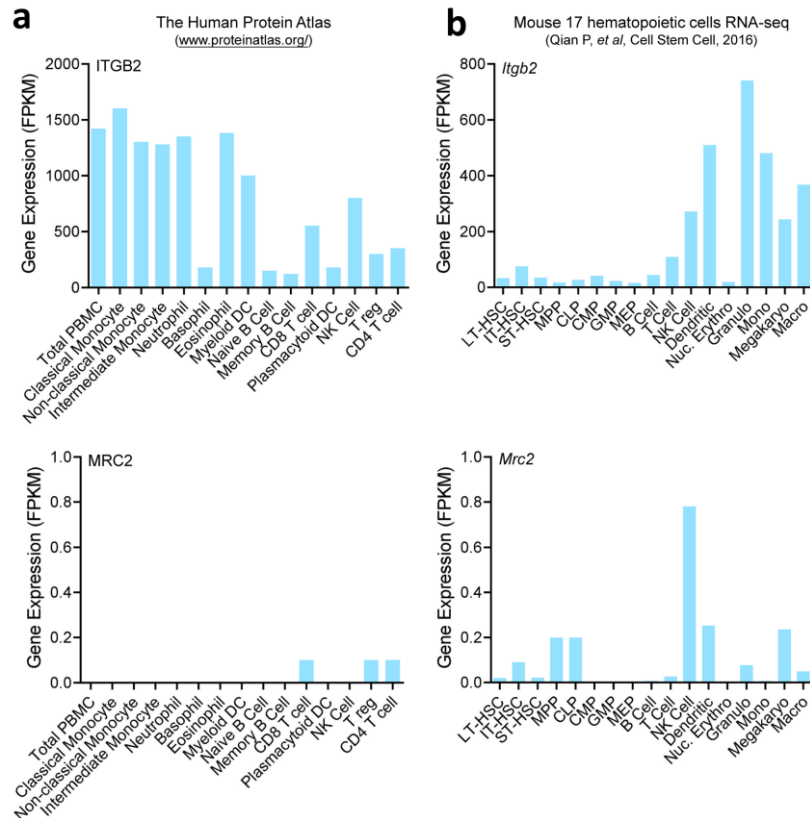

**Supplementary Figure 21. Gene expression analyses of ITGB2 and MRC2 in normal hematopoietic cells. a,** Expression of ITGB2 and MRC2 in human normal hematopoietic cells isolated for human protein atlas. **b,** Expression of ITGB2 and MRC2 in murine normal hematopoietic cells.

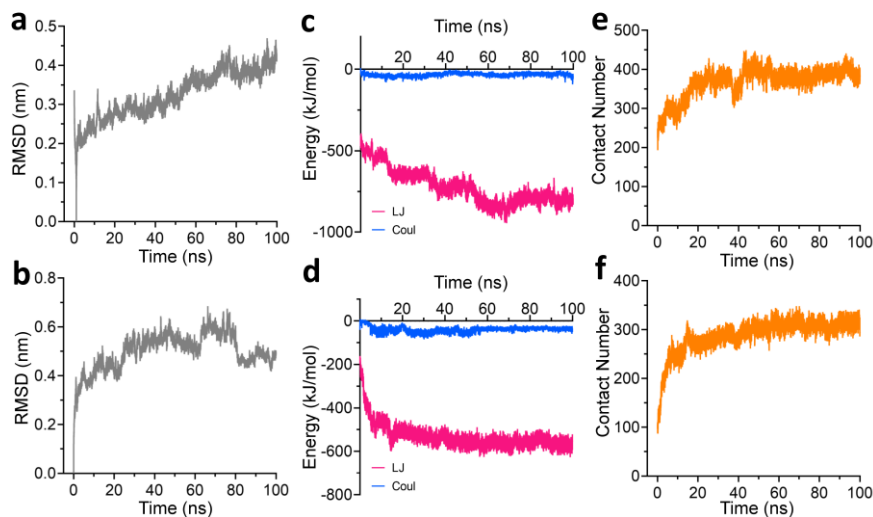

**Supplementary Figure 22. Molecular dynamic and molecular docking simulation of GDYO nanosheets and ITGB2/MRC2.** Root mean square deviation (RMSD, **a-b**), binding energy (**c-d**) and contact number (**e-f**) analysis in MD simulation of the interactions between GDYO nanosheets and ITGB2 (**a, c, e**) or MRC2 (**b, d, f**).

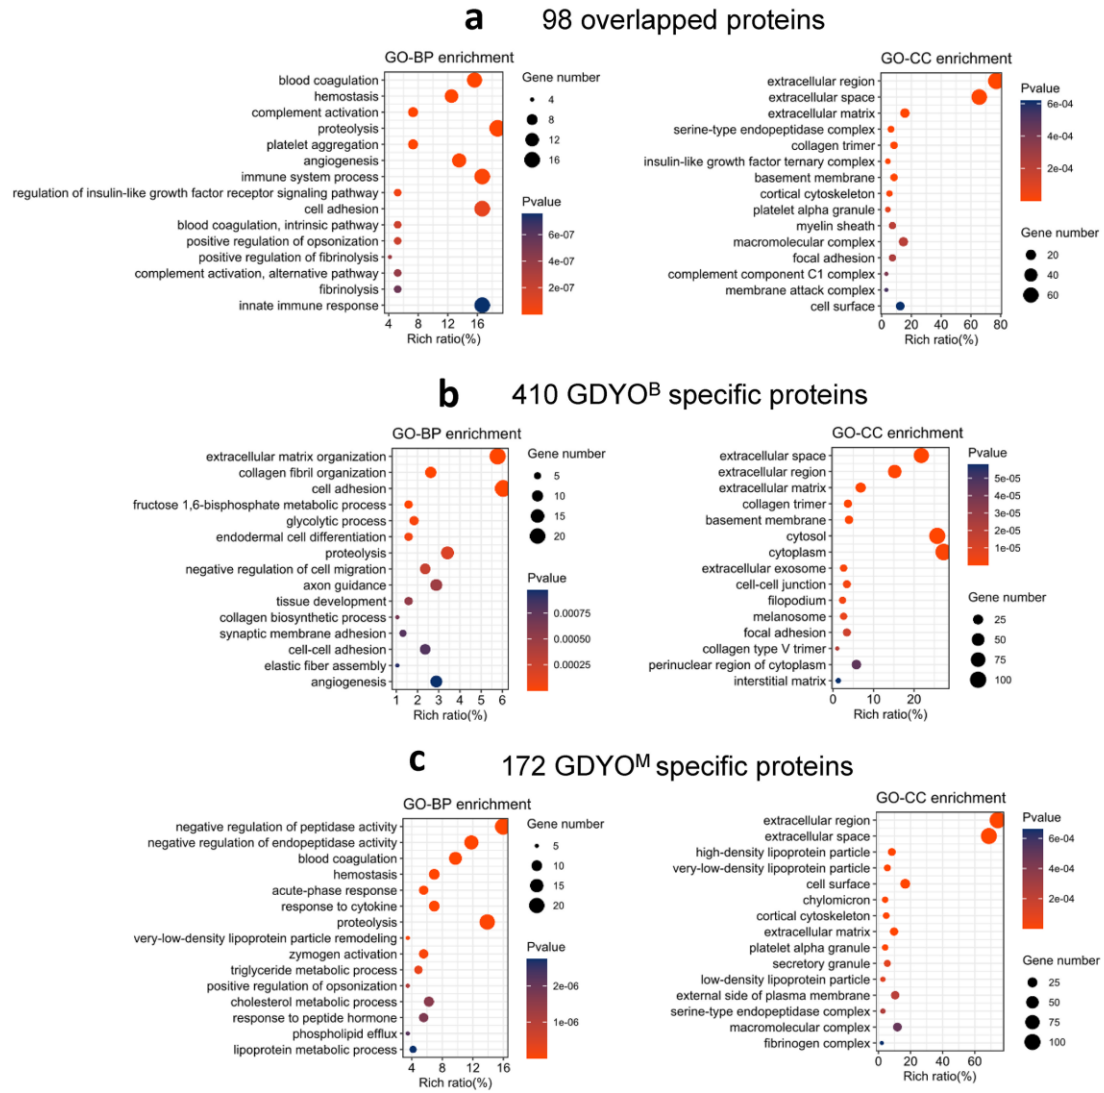

**Supplementary Figure 23. GO analysis of GDYO-absorbed proteins in FBS or mouse plasma.**  
**a**, Overlapped proteins of GDYO-absorbed proteins in FBS and mouse plasma. **b**, **c**, Specific proteins of GDYO-absorbed proteins in FBS (**b**) or mouse plasma (**c**). The statistical tests were one-sided and adjustments were made for multiple comparisons.

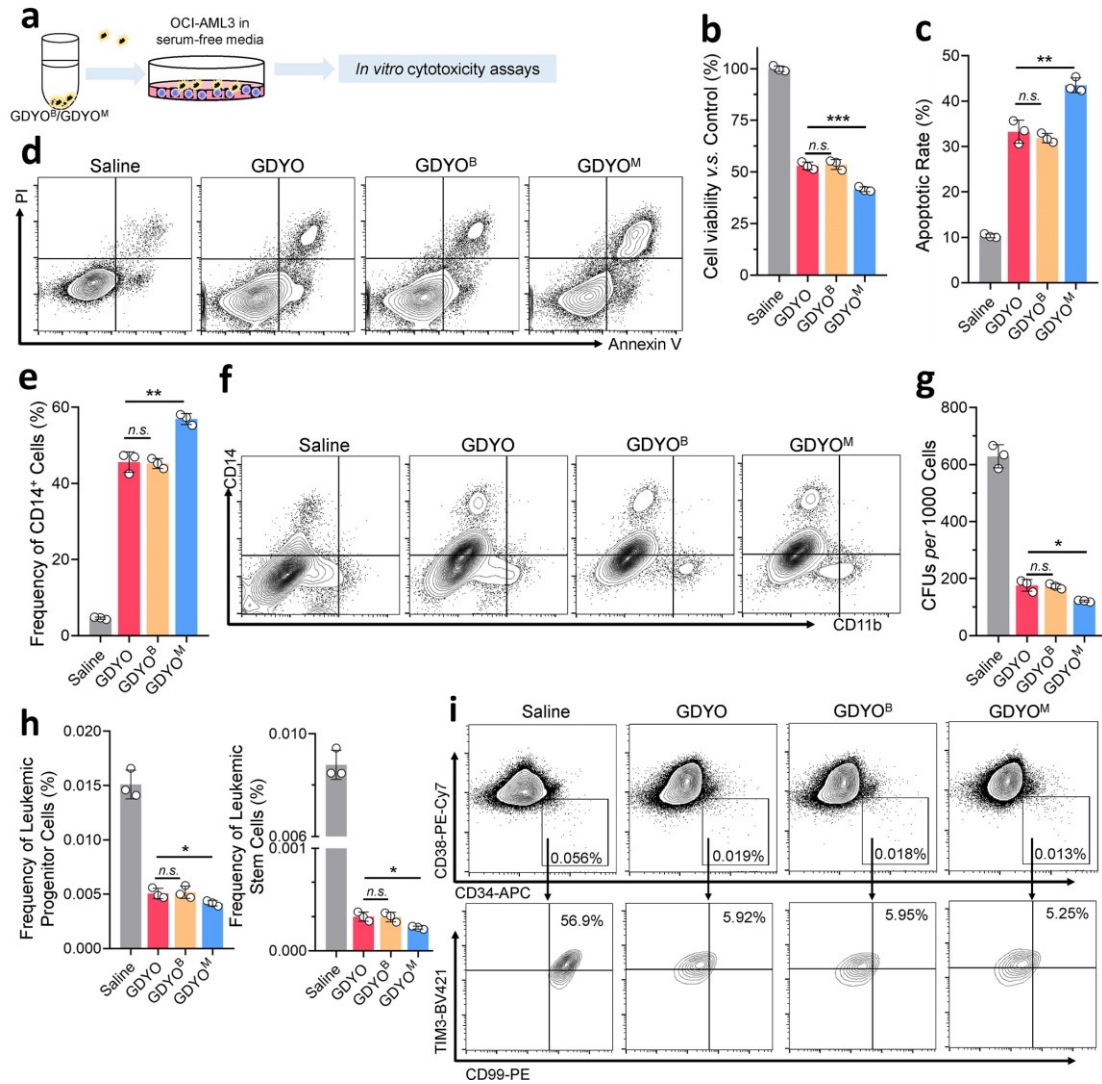

**Supplementary Figure 24. *In vitro* cytotoxicity assays of GDYO/GDYO<sup>B</sup>/GDYO<sup>M</sup> against OCI-AML3 in serum-free media.** **a**, Diagram to detect the *in vitro* cytotoxicity of GDYO<sup>B</sup>/GDYO<sup>M</sup> towards OCI-AML3 in serum-free media. **b**. Cell viability in OCI-AML3 treated with 20 μg/mL GDYO/GDYO<sup>B</sup>/GDYO<sup>M</sup> for 48 h. **c-d**. Apoptotic rates (**c**) and representative flow images (**d**) in OCI-AML3 treated with 20 μg/mL GDYO/GDYO<sup>B</sup>/GDYO<sup>M</sup> for 48 h. **e-f**. Frequency of CD14<sup>+</sup> cells (**e**) and representative flow images (**f**) in OCI-AML3 treated with 20 μg/mL GDYO/GDYO<sup>B</sup>/GDYO<sup>M</sup> for 48 h. **g**. CFU colonies after 10 d culture in methylcellulose medium for OCI-AML3. **h-i**. Frequency (**h**) and representative flow images (**i**) of leukemic progenitor cells and leukemic stem cells in OCI-AML3 treated with 20 μg/mL GDYO/GDYO<sup>B</sup>/GDYO<sup>M</sup> for 72 h. *n* = 3 biologically independent experiments. The data were shown as the mean ± SD. Statistical significance was tested with a two-tailed, unpaired Student's *t* test. *n.s.* no significant, \**P* < 0.05, \*\**P* < 0.01, \*\*\**P* < 0.001.

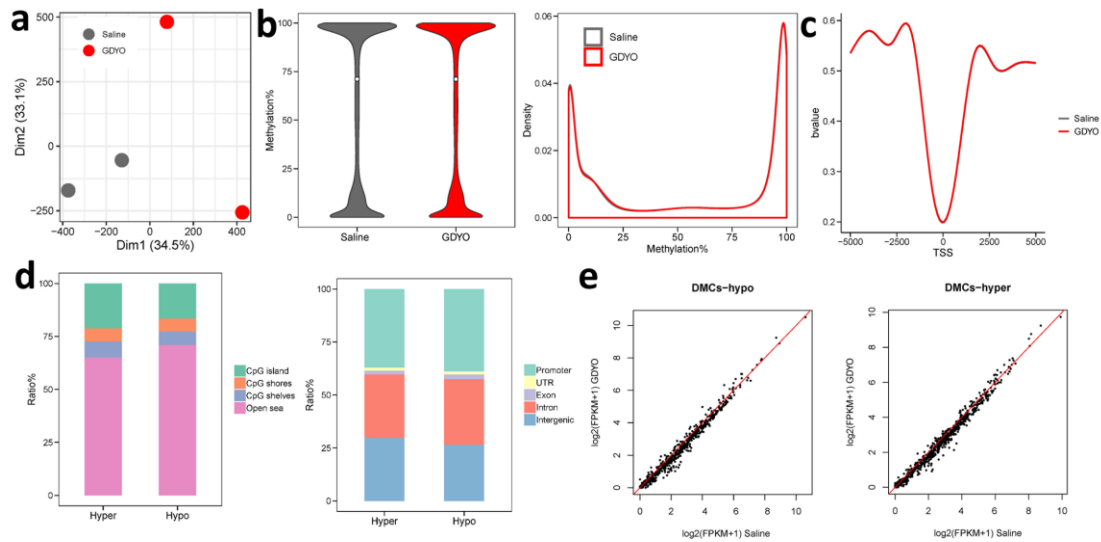

**Supplementary Figure 25. Methylome analysis in GDYO-treated OCI-AML3 cells.** **a.** PCA analysis for differentially methylated sites in saline or GDYO-treated OCI-AML3. **b.** Global methylation distribution in saline or GDYO-treated OCI-AML3 cells. **c-d.** Genomic distributions of differentially methylated sites. **e.** Correlation of hypomethylated and hypermethylated sites between saline and GDYO-treated OCI-AML3 cells.

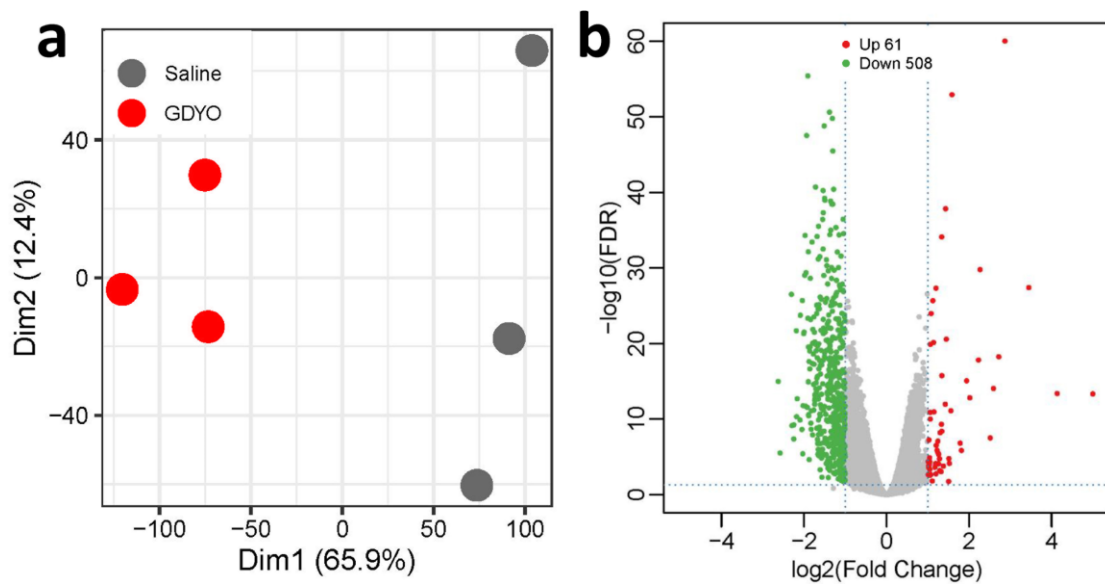

**Supplementary Figure 26. Transcriptome analysis for GDYO-treated OCI-AML3.** **a.** PCA analysis for RNA expression in saline or GDYO-treated OCI-AML3. **b.** Volcano plots of up- and down-regulated genes under GDYO treatment.



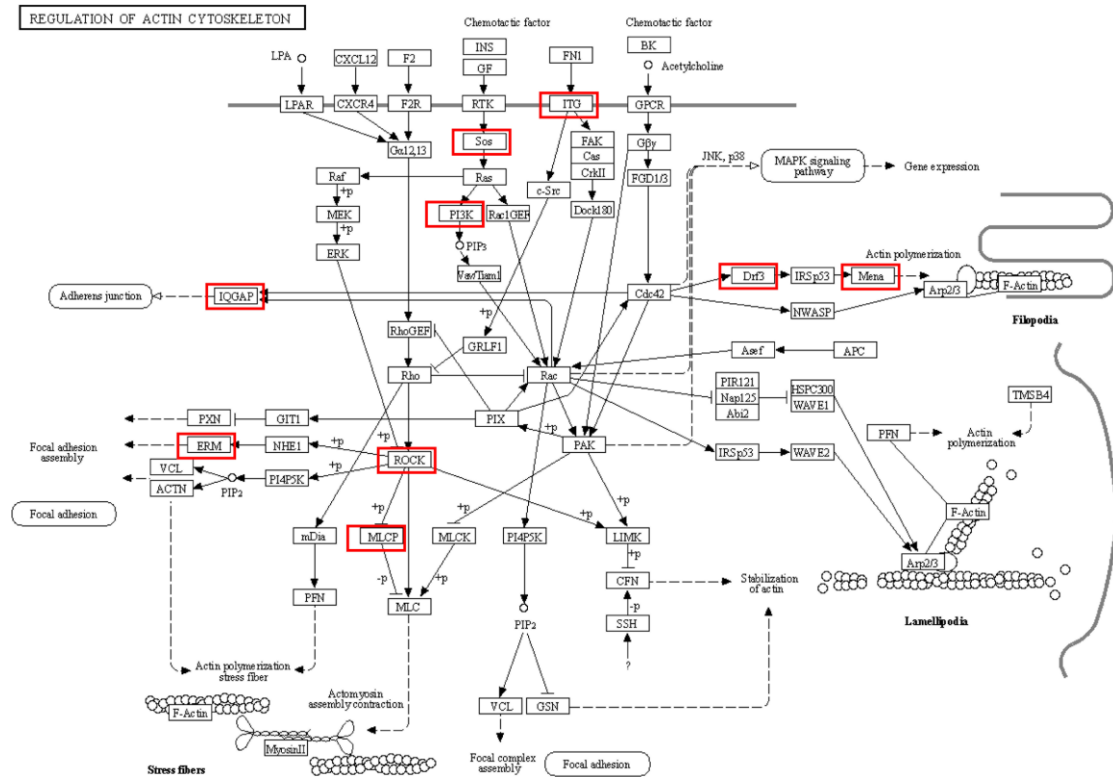

**Supplementary Figure 27. Regulation of actin cytoskeleton pathway from KEGG analysis.**  
 The red boxes represent the down-regulated genes under GDYO treatment.

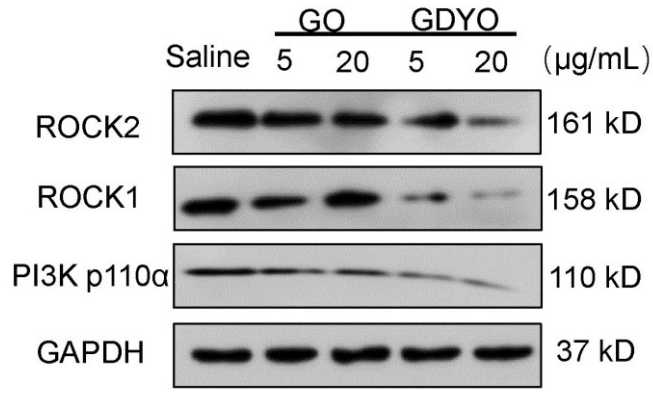

**Supplementary Figure 28. Immunoblotting verifications factor of genes correlated with actin cytoskeleton organization in protein level.**

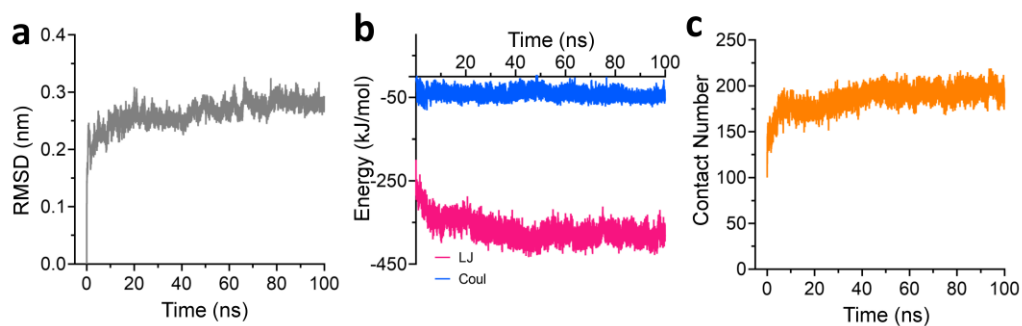

**Supplementary Figure 29. Molecular dynamic and molecular docking simulation of GDYO/GO nanosheets and actin.** Root mean square deviation (RMSD, **a**), binding energy (**b**) and contact number (**c**) analysis in MD simulation of the interactions between GDYO nanosheets and actin.

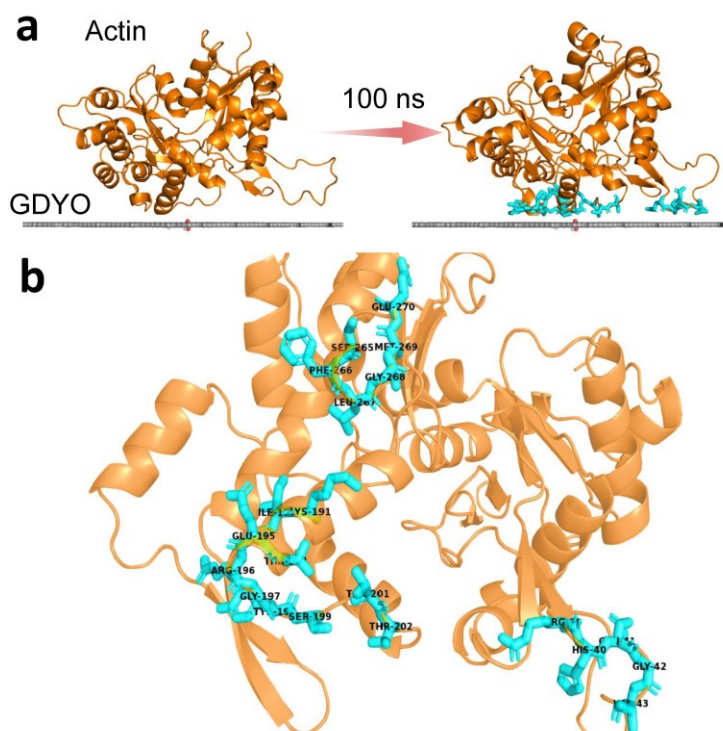

**Supplementary Figure 30. Molecular dynamic (MD) simulation of GDYO nanosheet and actin.** **a.** Side view of MD showing the adsorption of the actin protein onto GDYO nanosheet. **b.** Simulated binding site of GDYO onto actin monomer.

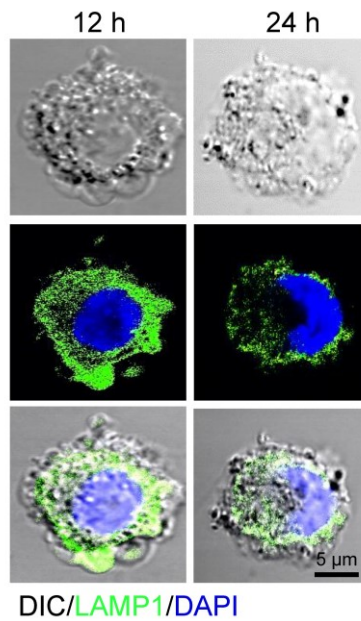

**Supplementary Figure 31.** Immunofluorescence confocal images with DIC component in OCI-AML3 treated by GDYO at 12 and 24 h. At least 10 images each group were taken. Scale bar, 5  $\mu$ m.

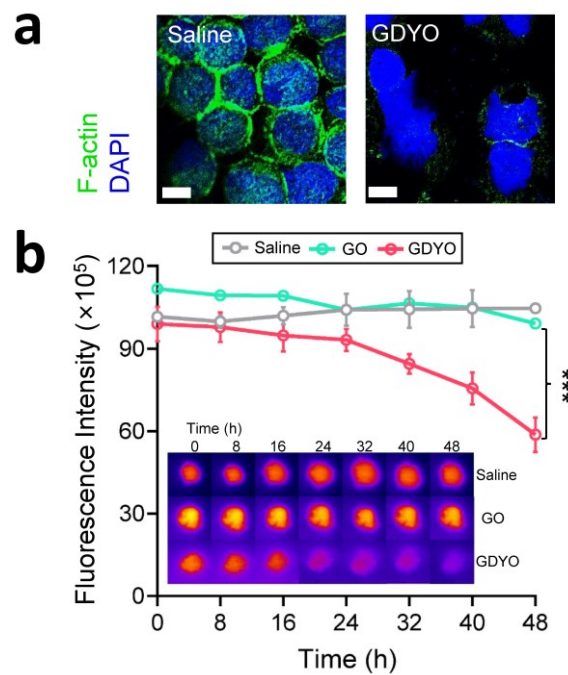

**Supplementary Figure 32.** GDYO nanosheets disrupted F-actin organization of *DNMT3A* mutant AML cells. **a**, Representative F-actin immunofluorescence confocal images of OCI-AML3 cells treated by GDYO for 48 h. Scale bar, 10  $\mu$ m. **b**, Live imaging of F-actin in OCI-AML3 cells treated by GO or GDYO within 48 h. Scale bar, 10  $\mu$ m.  $n = 20$  biologically independent cells. The data were shown as the mean  $\pm$  SD. Statistical significance was tested with a two-tailed, unpaired Student's  $t$  test. \*\*\* $P < 0.001$ .

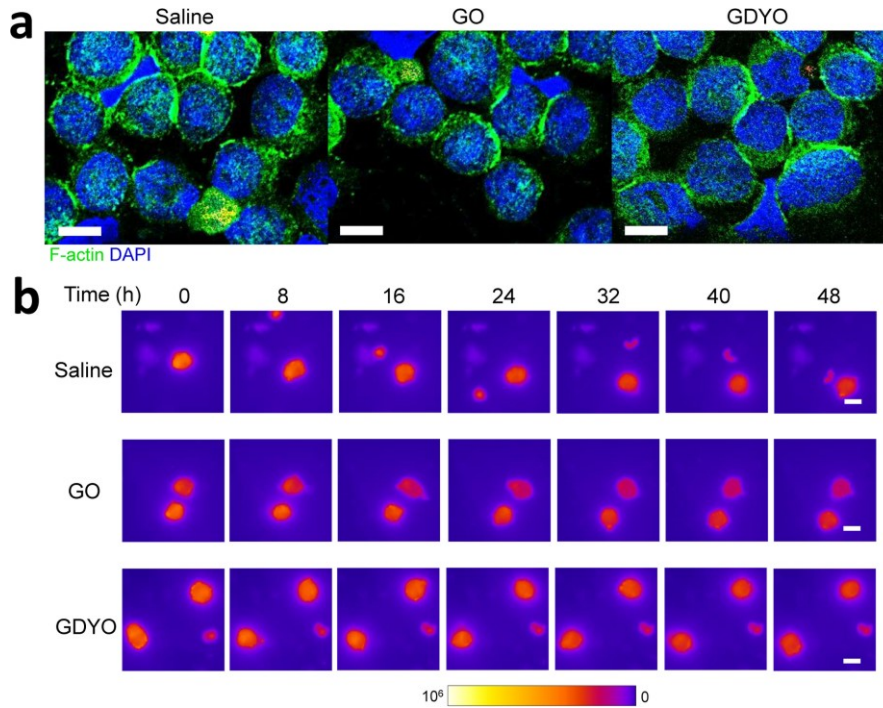

**Supplementary Figure 33. GDYO did not disrupt F-actin organization in *DNMT3A*-wt AML cells.** **a**, Representative F-actin immunofluorescence confocal images of HL-60 cells treated by GDYO for 48 h. At least 10 images each group were taken. Scale bar, 10  $\mu$ m. **b**, Live imaging of F-actin in HL-60 cells treated by GO or GDYO within 48 h. At least 20 images each group were taken. Scale bar, 10  $\mu$ m.

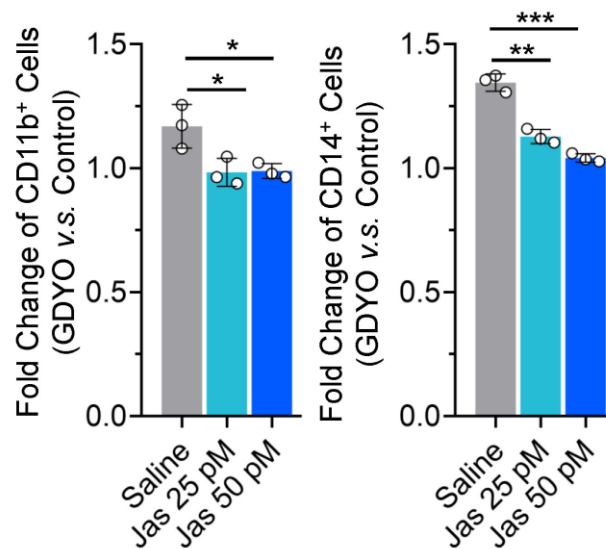

**Supplementary Figure 34.** Fold change of cell differentiation for GDYO *v.s.* control is rescued by Jas.  $n = 3$  biologically independent experiments. The data were shown as the mean  $\pm$  SD. Statistical significance was tested with a two-tailed, unpaired Student's  $t$  test. \* $P < 0.05$ , \*\* $P < 0.01$ , \*\*\* $P < 0.001$ .

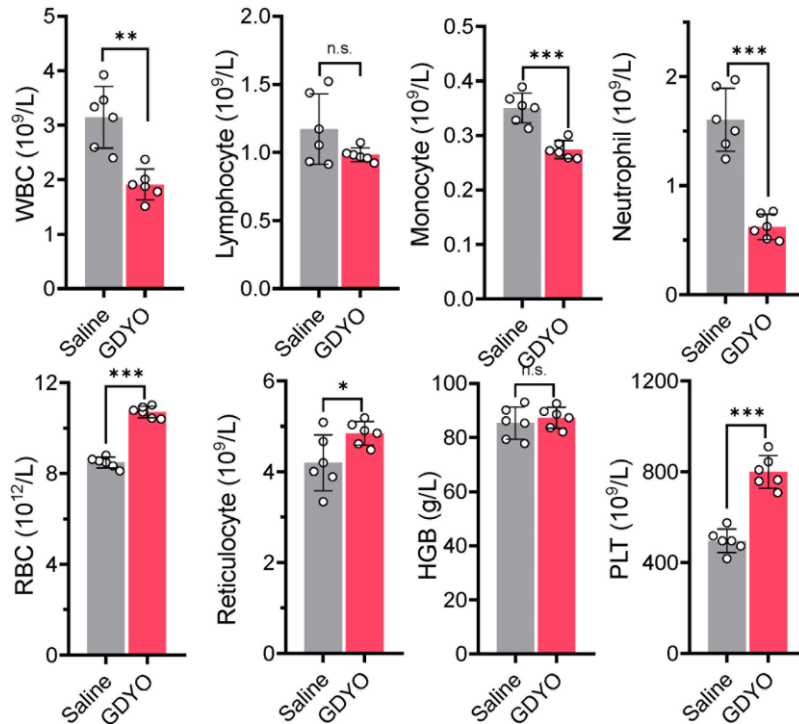

**Supplementary Figure 35. Hematological data in AML mice.** The AML NSG mice were treated with saline or GDYO. WBC, white blood cell, RBC, red blood cell, HGB, hemoglobin, PLT, platelets.  $n = 6$  biologically independent animals. The data were shown as the mean  $\pm$  SD. Statistical significance was tested with a two-tailed, unpaired Student's  $t$  test. *n.s.* no significant,  $*P < 0.05$ ,  $**P < 0.01$ ,  $***P < 0.001$ .

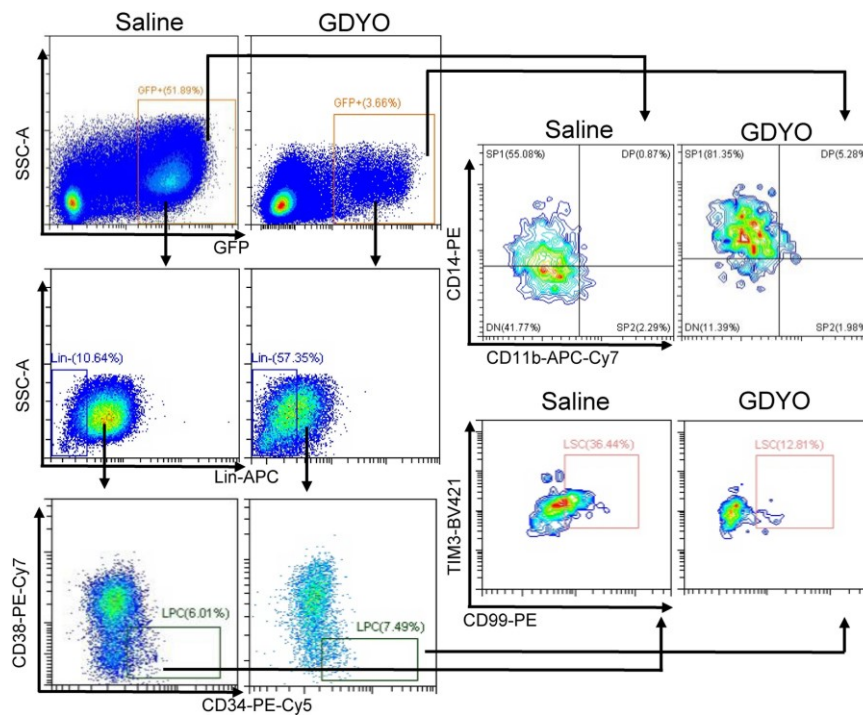

**Supplementary Figure 36. Representative flow cytometry images of spleen total mononuclear cells isolated from AML mice treated by saline or GDYO.**

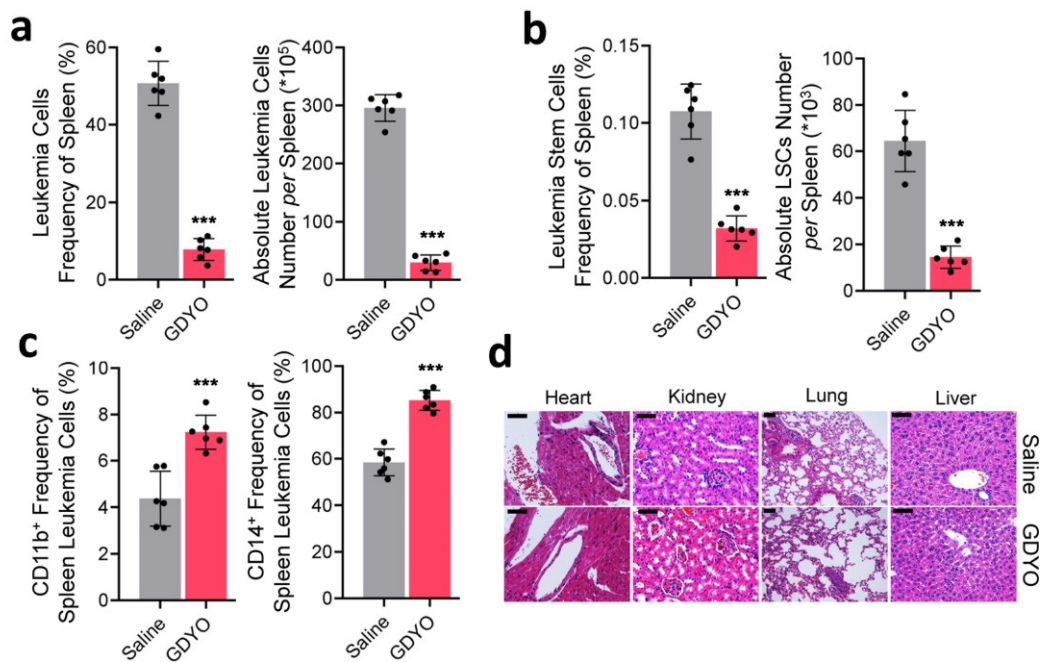

**Supplementary Figure 37. Analysis of AML mice treated by saline or GDYO.** a-c, Quantification of spleen leukemia cells (a), leukemic stem cells (b) and myeloid differentiation (c). d, H&E sections of main non-immune organs in mice with GDYO treatment. Scale bar, 10  $\mu$ m.  $n=6$  biologically independent animals. The data were shown as the mean  $\pm$  SD. Statistical significance was tested with a two-tailed, unpaired Student's  $t$  test. \*\*\* $P < 0.001$ .

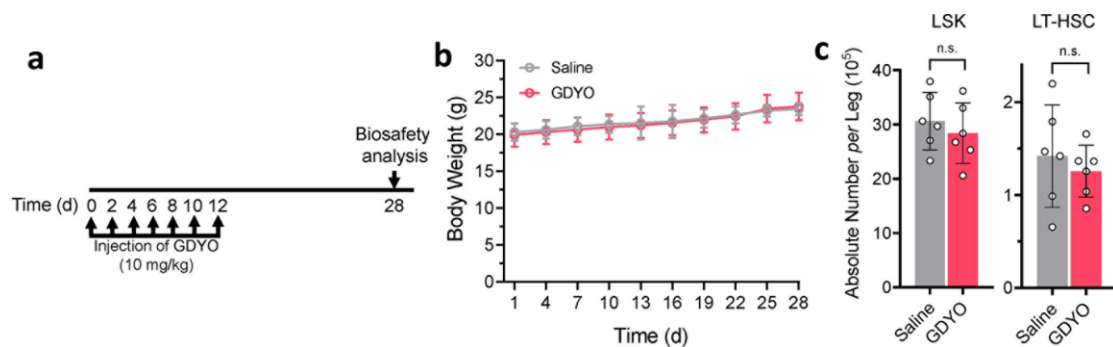

**Supplementary Figure 38. Biosafety assessment of GDYO in mice.** a, Schematic illustration of the *in vivo* experimental design. b, The body weights of C57BL/6 mice injected with saline or GDYO in 28 days. c, Absolute number of LT-HSCs (long-term HSCs) in mice injected with GDYO after sacrifice.  $n=6$  biologically independent animals. The data were shown as the mean  $\pm$  SD. Statistical significance was tested with a two-tailed, unpaired Student's  $t$  test. *n.s.* no significant.

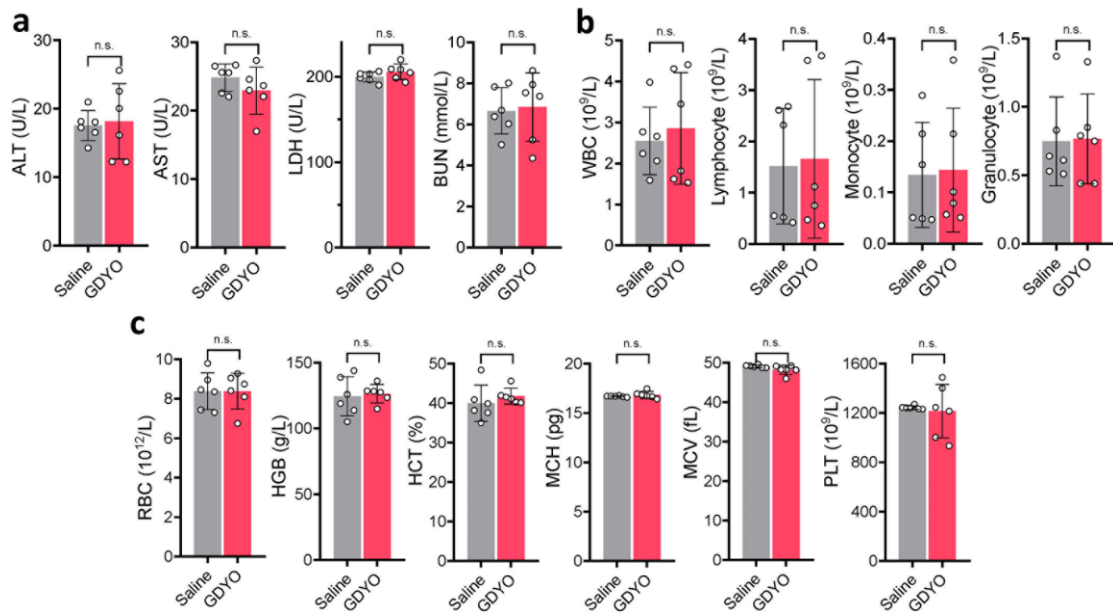

**Supplementary Figure 39. Blood analysis of C57BL/6 mice injected with GDYO.** **a**, Blood biochemical analysis of mice with GDYO treatment. ALT, alanine aminotransferase, AST, aspartate aminotransferase, LDH, lactate dehydrogenase, BUN, blood urea nitrogen. **b-c**, Hematological data of GDYO-treated mice. WBC, white blood cell, RBC, red blood cell, HGB, hemoglobin, HCT, hematocrit, MCH, mean corpuscular hemoglobin, MCV, mean corpuscular volume, PLT, platelets.  $n = 6$  biologically independent animals *per* group. The data were shown as the mean  $\pm$  SD. Statistical significance was tested with a two-tailed, unpaired Student's *t* test. *n.s.* no significant.

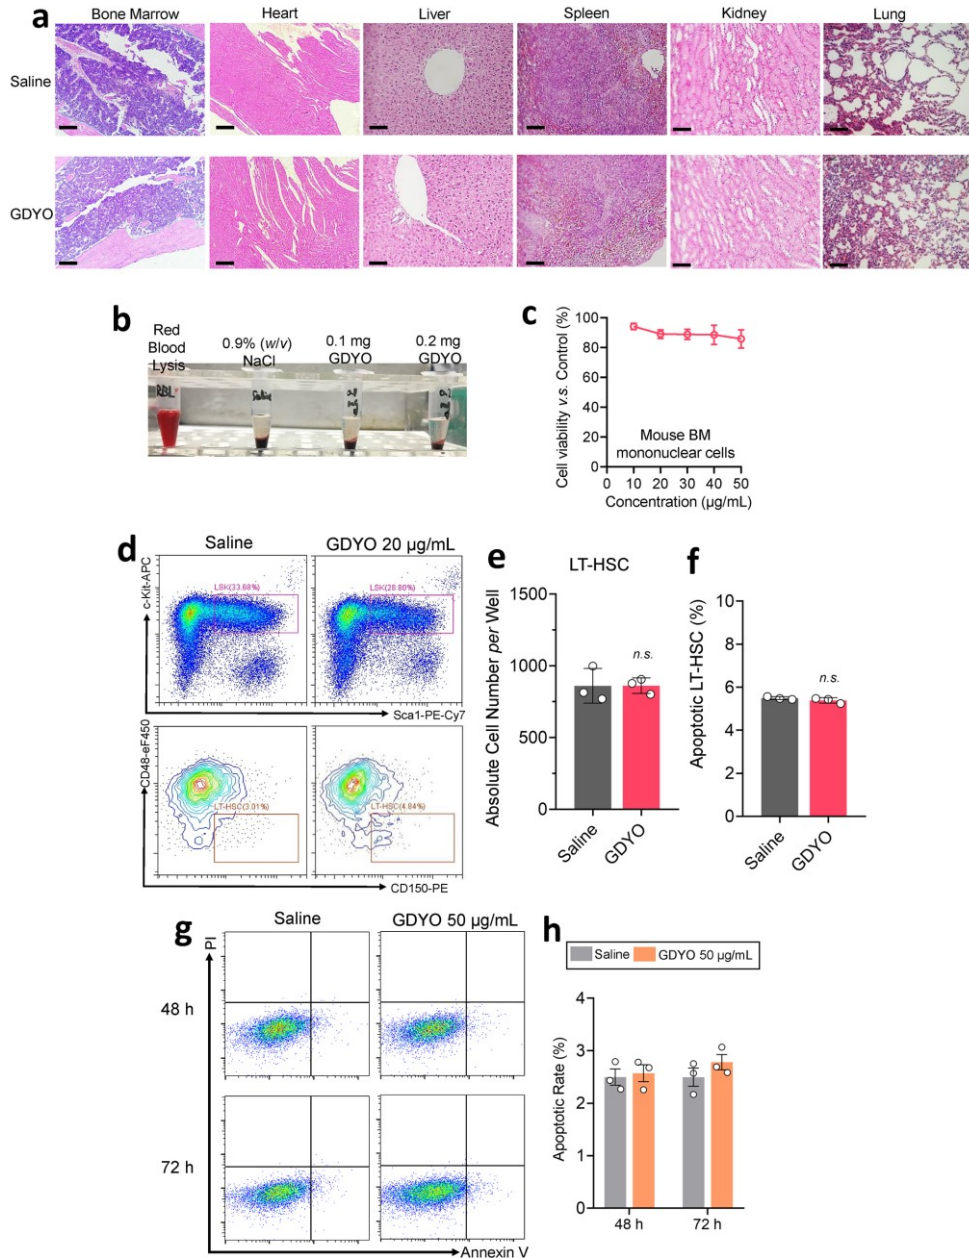

**Supplementary Figure 40. Biosafety assessment of GDYO.** **a**, H&E sections in main organs of mice with GDYO treatment. Scale bar, 10  $\mu\text{m}$ . **b**, Images of hemolysis analysis of GDYO with whole blood for 8 h. **c**, Cell viability test in mouse BM and human PB mononuclear cells which were incubated with GDYO for 24 h. The data were shown as the mean  $\pm$  SD. Statistical significance was tested with a two-tailed, unpaired Student's *t* test. *n* = 3 biologically independent animals *per* group. **d**, Representative flow cytometry images of LSK and LT-HSC after GDYO co-incubation for 28 d. **e**, **f**, Absolute number (**e**) and apoptotic frequency (**f**) of LT-HSC after GDYO co-incubation for 28 d. **g**, **h**, Representative flow cytometry images (**g**) and apoptotic frequency (**h**) of human neuron cell line SH-SY5Y after GDYO co-incubation for 48 and 72 h. *n* = 3 biologically independent experiments. The data were shown as the mean  $\pm$  SD. Statistical significance was tested with a two-tailed, unpaired Student's *t* test. *n.s.* no significant.
